# Supplementary material for: Establishment and Comparative Analysis of Enzyme-Linked Immunoassay and Time-Resolved Fluoroimmunoassay for the Determination of Trace Quinclorac in Environment
Source: MDPI journal article supplement (doi:10.3390/bios12050338), 2022-05-14
Supplement: s1 [file s1]

## Supplementary Material

**Figure S1.** The  $^1\text{H}$ -NMR spectra of quinclorac hapten.

**Figure S2.** The UV absorption spectra of hapten, coating antigen and OVA.

**Figure S3.** The UV absorption spectra of hapten, immunogen and BSA.

**Figure S4.** The SDS-PAGE of MAb.

**Table S1.** The optimization of the ELISA and TRFIA parameters for quinclorac.

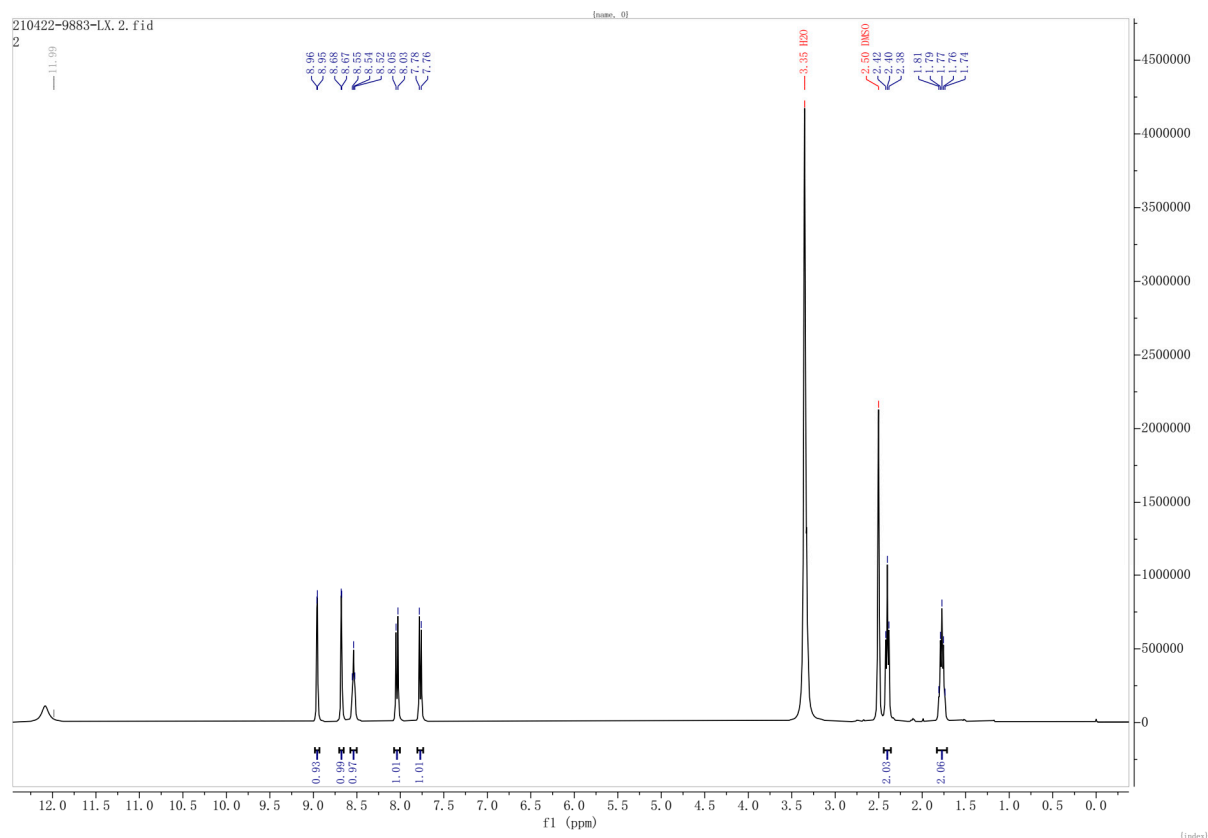

**Figure S1.** The  $^1\text{H}$ -NMR spectra of quinclorac hapten.

**$^1\text{H}$ -NMR information:** 1.81-1.74 ppm (2H,  $-\text{CH}_2$ ), 2.42 - 2.38 ppm (2H,  $-\text{CH}_2$ ), 7.78 - 7.76 ppm (1H, benzene ring), 8.05 - 8.03 ppm (1H, benzene ring), 8.55 - 8.52 ppm (1H,  $-\text{NH}-$ ), 8.68 - 8.67 ppm (1H, pyridine ring), 8.95 - 8.96 ppm (1H, pyridine ring), 11.9 ppm (1H,  $-\text{COOH}$ ).

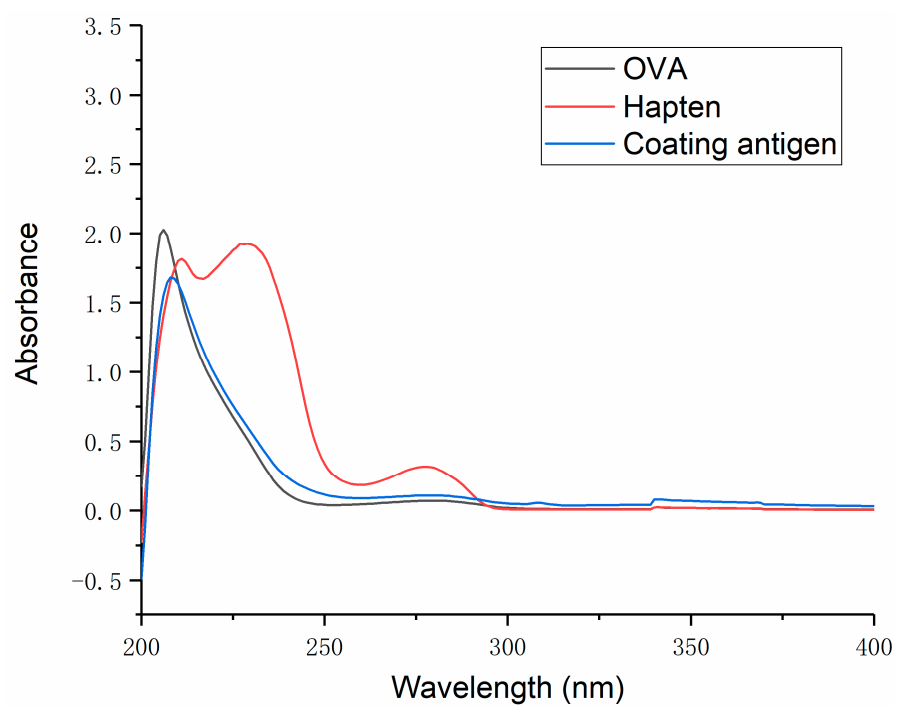

**Figure S2.** The UV absorption spectra of hapten, coating antigen and OVA.

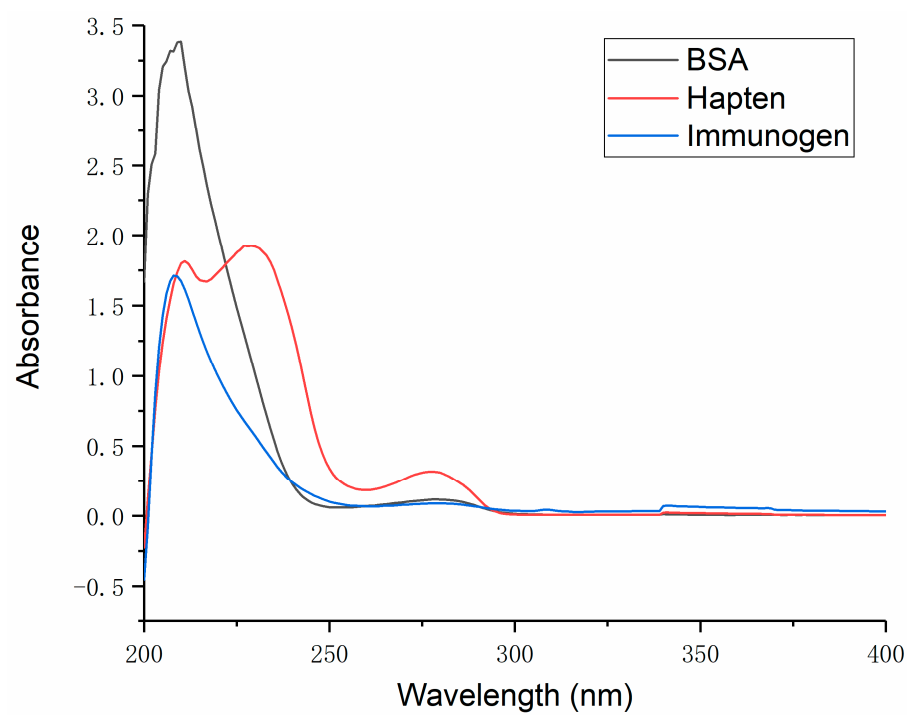

**Figure S3.** The UV absorption spectra of hapten, immunogen and BSA.

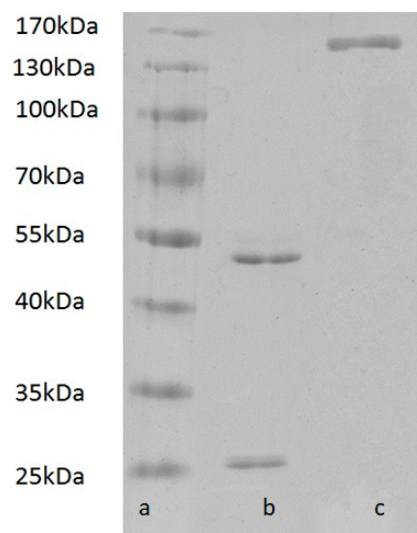

**Figure S4.** The SDS-PAGE of MAb.

(a: marker; b: denatured MAb; c: no denatured MAb)

**Table S1.** The optimization of the ELISA and TRFIA parameters for quinclorac.

| Parameters                 |     | ELISA                   |                                    | TRFIA                   |                                    |
|----------------------------|-----|-------------------------|------------------------------------|-------------------------|------------------------------------|
|                            |     | IC <sub>50</sub> (mg/L) | A <sub>max</sub> /IC <sub>50</sub> | IC <sub>50</sub> (mg/L) | F <sub>max</sub> /IC <sub>50</sub> |
| Methanol<br>(v/v,%)        | 0   | 0.453                   | 5.32                               | 1.152                   | 17350                              |
|                            | 5   | 0.164                   | 14.6                               | 0.135                   | 128585                             |
|                            | 10  | 0.172                   | 13.9                               | 0.101                   | 248624                             |
|                            | 20  | 0.210                   | 10.7                               | 0.323                   | 41644                              |
|                            | 30  | 0.370                   | 7.05                               | 0.755                   | 16735                              |
| Na <sup>+</sup><br>(mol/L) | 0.1 | 0.271                   | 8.79                               | 0.251                   | 82231                              |
|                            | 0.2 | 0.205                   | 10.4                               | 0.172                   | 100837                             |
|                            | 0.3 | 0.179                   | 12.5                               | 0.124                   | 130645                             |
|                            | 0.4 | 0.159                   | 14.1                               | 0.111                   | 109108                             |
|                            | 0.5 | 0.243                   | 9.28                               | 0.285                   | 47667                              |
| pH                         | 5.5 | 0.456                   | 2.55                               | 0.286                   | 88255                              |
|                            | 6.5 | 0.446                   | 4.96                               | 0.289                   | 72696                              |
|                            | 7.5 | 0.179                   | 12.5                               | 0.088                   | 223477                             |
|                            | 8.5 | 0.215                   | 9.04                               | 0.104                   | 193673                             |
|                            | 9.5 | 0.450                   | 5.03                               | 1.458                   | 17449                              |
